# Supplementary material
Source: publisher site journal article supplement (https://www.dovepress.com/article/supplementary_file/596452/596452%20Supplementary%20Material.docx)
Supplement: Supplementary file 1 [file 596452%20Supplementary%20Material.docx]

**Supplementary Material**

**Table S1.** ICD-10 codes for all diagnoses and ICD-8 codes for comorbidities from the Danish National Patient Registry.

| Diagnosis | ICD-8 code | ICD-10 code |
| --- | --- | --- |
| Stress disorders | | |
| Acute stress reaction |  | F43.0 |
| Posttraumatic stress disorder |  | F43.1 |
| Adjustment disorder |  | F43.2 |
| Other reactions to severe stress |  | F43.8 |
| Reaction to severe stress, unspecified |  | F43.9/F43 |
| HPV-related cancers | | |
| Cervical cancer |  | C53 |
| Anal cancer |  | C21 (morphology codes other than 809, 872-879) |
| Vulvar cancer |  | C51 (morphology code other than 809) |
| Vaginal cancer |  | C52 (morphology code other than 809) |
| Penile cancer |  | C60 (morphology code other than 809) |
| Base of tongue cancer |  | C01 |
| Tonsillar cancer |  | C09 |
| Oropharyngeal cancer |  | C10 |
| Psychiatric comorbidities | | |
| Anxiety disorder |  | F40-F41 |
| Depression |  | F32, F33 |
| Alcohol use disorder |  | F10 |
| Substance use disorder |  | F11-F19 |
| CCI conditions | | |
| Myocardial infarction | 410 | I21, I22, I23 |
| Congestive heart failure | 427.09, 427.10, 427.11, 427.19, 428.99, 782.49 | I50, I110, I130, I132 |
| Peripheral vascular disease | 440, 441, 442, 443, 444, 445 | I70, I71, I72, I73, I74, I77 |
| Cerebrovascular disease | 430-438 | I60-I69, G45, G46 |
| Dementia | 290.09-290.19, 293.09 | F00, F01, F02, F03, F051, G30 |
| Chronic pulmonary disease | 490-493, 515-518 | J40, J41, J42, J43, J44, J45, J46, J47, J60, J61, J62, J63, J64, J65, J66, J67, J684, J701, J703, J841, J920, J961, J982, J983 |
| Connective tissue disease | 712; 716; 734; 446; 135.99 | M05, M06, M08, M09, M30, M31, M32, M33, M34, M35, M36, D86 |
| Ulcer disease | 530.91, 530.98, 531-534 | K221, K25, K26, K27, K28 |
| Mild liver disease | 571, 573.01, 573.04 | B18, K700, K701, K702, K703, K709, K71, K73, K74, K760 |
| Diabetes | 249.00, 249.06, 249.07, 249.09, 250.00, 250.06, 250.07, 250.09 | E100, E101, E109, E110, E111, E119 |
| Hemiplegia | 344 | G81, G82 |
| Moderate to severe renal disease | 403, 404, 580-583, 584, 590.09, 593.19, 753.10- 753.19, 792 | I12, I13, N00, N01, N02, N03, N04, N05, N07, N11, N14, N17, N18, N19, Q61 |
| Diabetes with end organ damage | 249.01-249.05, 249.08, 250.01-250.05, 250.08 | E102, E103, E104, E105, E106, E107, E108, E112, E113, E114, E115, E116, E117, E118 |
| Moderate to severe liver disease | 070.00, 070.02, 070.04, 070.06, 070.08, 573.00, 456.00-456.09 | B150, B160, B162, B190, K704, K72, K766, I85 |
| AIDS | 079.83 | B21, B22, B23, B24 |

**Abbreviations:** ICD, *International Classification of Diseases* (Eighth or tenth revisions); CCI, Charlson Comorbidity Index.

**Notes:** Charlson Comorbidity Index is a modified version in which cancer groups are excluded. Diagnoses in the Danish National Patient Registry are coded by ICD-8 until 1993 and by ICD-10 thereafter.

**Table S2.** STROBE Statement, checklist of items that should be included in reports of observational studies

|  | Item No. | Recommendation | Page  No. | Relevant text from manuscript | |
| --- | --- | --- | --- | --- | --- |
| Title and abstract | 1 | (*a*) Indicate the study’s design with a commonly used term in the title or the abstract | 1 | Title.  ‘Stress disorders and human papillomavirus-related cancer rates: A population-based cohort study in Denmark.’ | |
| (*b*) Provide in the abstract an informative and balanced summary of what was done and what was found | 2 | Abstract: Methods, Results. | |
| Introduction | | | |  | |
| Background/rationale | 2 | Explain the scientific background and rationale for the investigation being reported | 3 | Introduction: paragraphs 1-3. | |
| Objectives | 3 | State specific objectives, including any prespecified hypotheses | 3 | Introduction: paragraph 4. | |
| Methods | | | |  | |
| Study design | 4 | Present key elements of study design early in the paper | 4-6 | Methods: Setting, Data sources, Stress disorder cohort, Comparison cohort, HPV-related and other cancers, Covariates | |
| Setting | 5 | Describe the setting, locations, and relevant dates, including periods of recruitment, exposure, follow-up, and data collection | 4-6 | Methods: Setting, Data sources, Stress disorder cohort, Comparison cohort, HPV-related and other cancers, Covariates | |
| Participants | 6 | (*a*) *Cohort study*—Give the eligibility criteria, and the sources and methods of selection of participants. Describe methods of follow-up  *Case-control study*—Give the eligibility criteria, and the sources and methods of case ascertainment and control selection. Give the rationale for the choice of cases and controls  *Cross-sectional study*—Give the eligibility criteria, and the sources and methods of selection of participants | 4-6 | Methods: Setting, Data sources, Stress disorder cohort, Comparison cohort, HPV-related and other cancers | |
| (*b*) *Cohort study*—For matched studies, give matching criteria and number of exposed and unexposed  *Case-control study*—For matched studies, give matching criteria and the number of controls per case | 5 | Methods: Comparison cohort. | |
| Variables | 7 | Clearly define all outcomes, exposures, predictors, potential confounders, and effect modifiers. Give diagnostic criteria, if applicable | 4-6 | Methods: Data sources, Stress disorder cohort, Comparison cohort, Covariates | |
| Data sources/ measurement | 8* | For each variable of interest, give sources of data and details of methods of assessment (measurement). Describe comparability of assessment methods if there is more than one group | 4-6 | Methods: Data sources, Stress disorder cohort, Comparison cohort, HPV-related and other cancers | |
| Bias | 9 | Describe any efforts to address potential sources of bias |  | Methods: Comparison cohort, HPV-related and other cancers, Statistical analyses | |
| Study size | 10 | Explain how the study size was arrived at | 4-6 | Methods: Setting, Stress disorder cohort, Comparison cohort, HPV-related and other cancers, Figure 1 | |
| Quantitative variables | 11 | Explain how quantitative variables were handled in the analyses. If applicable, describe which groupings were chosen and why | 7 | Methods: Statistical analyses | |
| Statistical methods | 12 | (a) Describe all statistical methods, including those used to control for confounding | 7 | Methods: Statistical analyses.  ‘We adjusted for potential confounders including age, sex, and year of diagnosis by design and additionally adjusted for marital status, CCI score, anxiety, depression, alcohol use disorder and substance use disorder in multivariable models.’ | |
|  |  | (b) Describe any methods used to examine subgroups and interactions | 7 | Methods: Statistical analyses.  ‘In secondary analyses, we stratified results by age at stress disorder diagnosis and length of follow-up. Furthermore, we restricted to women and stratified results by 1) stress disorder diagnoses (or matching) pre-2009 versus post-2009, when prophylactic vaccines against HPV infection were first introduced for 12-year old girls in Denmark,44 and 2) women in birth cohorts which were eligible vs. ineligible for HPV vaccination. Women eligible for the vaccine included those born in 1996 or later and those born in 1985-1992 with an index date after 1 August 2012, when vaccination catch-up programs were implemented.’ | |
|  |  | (c) Explain how missing data were addressed |  | Methods: Statistical analyses.  ‘The absence of recorded diagnoses in the registry was treated as the absence of the condition and not as missing data.’ | |
|  |  | (d) Cohort study—If applicable, explain how loss to follow-up was addressed  Case-control study—If applicable, explain how matching of cases and controls was addressed  Cross-sectional study—If applicable, describe analytical methods taking account of sampling strategy | 6 | Methods: HPV-related and other cancers.  ‘We followed patients until first HPV-related cancer (cervical, anal, vulvar, vaginal, penile, base of tongue, tonsillar, or oropharyngeal cancer) and follow-up was censored at date of any other cancer diagnosis, death, or 31 December 2022, whichever came first.’ | |
|  |  | (e) Describe any sensitivity analyses | 7 | Methods: Statistical analyses.  ‘To assess the robustness of our results, we conducted sensitivity analyses using alternative lag periods of 6 months and 2 years between stress disorder and HPV-related cancer diagnoses. We also estimated crude and adjusted HRs and 95% CIs across increasing follow-up durations. Both analyses were stratified by sex.‘ | |
| Results | | | | | |
| Participants | 13* | (a) Report numbers of individuals at each stage of study—eg numbers potentially eligible, examined for eligibility, confirmed eligible, included in the study, completing follow-up, and analysed |  | Results: paragraph 1.  Figure 1. | |
| (b) Give reasons for non-participation at each stage |  | Figure 1 | |
| (c) Consider use of a flow diagram |  | Figure 1 | |
| Descriptive data | 14* | (a) Give characteristics of study participants (eg demographic, clinical, social) and information on exposures and potential confounders | 7 | Results: paragraphs 1-2.  Table 1. | |
| (b) Indicate number of participants with missing data for each variable of interest |  | Methods: Statistical analyses.  ‘The absence of recorded diagnoses in the registry was treated as the absence of the condition and not as missing data.’  Table 1. | |
| (c) *Cohort study*—Summarise follow-up time (eg, average and total amount) | 7-8 | Results: paragraph 1.  ‘Our cohort included 242,828 patients with a hospital-based diagnosis of a stress disorder with a median follow-up time of 10.2 years (IQR: 5.5-16.6 years). The comparison cohort included 1,199,398 individuals without a stress disorder diagnosis with a median follow-up time of 10.5 years (IQR: 5.7-17.0 years).’  Table 1. | |
| Outcome data | 15* | *Cohort study*—Report numbers of outcome events or summary measures over time | *8-9* | Results: paragraph 3.  Table 2.  Table S3. | |
| *Case-control study—*Report numbers in each exposure category, or summary measures of exposure |  | N/A | |
| *Cross-sectional study—*Report numbers of outcome events or summary measures |  | N/A | |
| Main results | 16 | (*a*) Give unadjusted estimates and, if applicable, confounder-adjusted estimates and their precision (eg, 95% confidence interval). Make clear which confounders were adjusted for and why they were included | 8-9 | Results: paragraph 3.  Table 2.  Table S3. | |
| (*b*) Report category boundaries when continuous variables were categorized |  | Table 1. | |
| (*c*) If relevant, consider translating estimates of relative risk into absolute risk for a meaningful time period |  | N/A | |
| Report other analyses done—eg analyses of subgroups and interactions, and sensitivity analyses | 9 | Results: paragraph .4  Table 3. | |
| Discussion | | | | | |
| Key results | 18 | Summarise key results with reference to study objectives | 9 | Discussion: paragraph 1. |
| Limitations | 19 | Discuss limitations of the study, taking into account sources of potential bias or imprecision. Discuss both direction and magnitude of any potential bias | 11 | Discussion: paragraph 8. |
| Interpretation | 20 | Give a cautious overall interpretation of results considering objectives, limitations, multiplicity of analyses, results from similar studies, and other relevant evidence |  | Discussion. |
| Generalisability | 21 | Discuss the generalisability (external validity) of the study results | 11 | Discussion: paragraph 8. |
| Other information | | | | | |
| Funding | 22 | Give the source of funding and the role of the funders for the present study and, if applicable, for the original study on which the present article is based |  | Acknowledgments.  ‘This work was supported in part by the Boston University Center for Trauma and Mental Health.’ |

*Give information separately for cases and controls in case-control studies and, if applicable, for exposed and unexposed groups in cohort and cross-sectional studies.

**Note:** An Explanation and Elaboration article discusses each checklist item and gives methodological background and published examples of transparent reporting. The STROBE checklist is best used in conjunction with this article (freely available on the Web sites of PLoS Medicine at http://www.plosmedicine.org/, Annals of Internal Medicine at http://www.annals.org/, and Epidemiology at http://www.epidem.com/). Information on the STROBE Initiative is available at www.strobe-statement.org.

**Table S3.** Rates of HPV-related cancers among stress disorder and comparison cohorts stratified by sex, Denmark, 1995 to 2022

| Outcome | Stress disorder cohort | | Comparison cohort | |
| --- | --- | --- | --- | --- |
| N | IR per 10,000 person-years  (95% CI) | N | IR per 10,000 person-years  (95% CI) |
| Women | | | | |
| *Any HPV-related cancer* | 567 | 3.7  (3.4-4.0) | 2064 | 2.7  (2.6-2.8) |
| Vulvar cancer | 69 | 0.4  (0.3-0.6) | 212 | 0.3  (0.2-0.3) |
| Vaginal cancer | 11 | 0.1  (0.0-0.1) | 47 | 0.1  (0.0-0.1) |
| Cervical cancer | 336 | 2.2  (1.9-2.4) | 1282 | 1.7  (1.6-1.8) |
| Anal cancer | 62 | 0.4  (0.3-0.5) | 248 | 0.3  (0.3-0.4) |
| Base of tongue cancer | 13 | 0.1  (0.0-0.1) | 50 | 0.1  (0.0-0.1) |
| Tonsillar cancer | 42 | 0.3  (0.2-0.4) | 125 | 0.2  (0.1-0.2) |
| Oropharyngeal cancer | 34 | 0.2  (0.1-0.3) | 100 | 1.8  (1.2-2.6) |
| Men | | | | |
| *Any HPV-related cancer* | 188 | 1.9  (1.6-2.2) | 756 | 1.5  (1.4-1.6) |
| Anal cancer | 28 | 0.3  (0.2-0.4) | 81 | 0.2  (0.1-0.2) |
| Penile cancer | 18 | 0.2  (0.1-0.3) | 105 | 0.2  (0.2-0.2) |
| Base of tongue cancer | 25 | 0.3  (0.2-0.4) | 98 | 0.2  (0.2-0.2) |
| Tonsillar cancer | 69 | 0.7  (0.5-0.9) | 285 | 0.6  (0.5-0.6) |
| Oropharyngeal cancer | 48 | 0.5  (0.3-0.6) | 187 | 0.4  (0.3-0.4) |

**Abbreviations:** HPV, human papillomavirus; CCI, Charlson Comorbidity Index; IR, incidence rate; HR, hazard ratio; aHR, adjusted hazard ratio; CI, confidence interval.

**Notes:** Among women, there are 1,543,068 total person-years for the stress disorder cohort and 7,686,471 person-years for the comparison cohort. Among men, there are 988,571 total person-years for the stress disorder cohort and 5,112,349 person-years for the comparison cohort. Both unadjusted and adjusted hazard ratios are adjusted for age, sex and calendar year by design. Adjusted hazard ratios are additionally adjusted for marital status, Charlson Comorbidity Index (CCI) score, anxiety, depression and alcohol and substance use disorder diagnoses.

**Table S4.** Rate of any HPV-related cancer among patients with stress disorders compared to a comparison cohort by increasing follow-up period, Denmark, 1995-2022

| Follow-up period | Stress disorder cohort | | | Comparison cohort | | | Unadjusted model | Model adjusted for marital status, CCI and psychiatric disorders |
| --- | --- | --- | --- | --- | --- | --- | --- | --- |
| N | Total person-years | IR per 10,000 person-years (95% CI) | N | Total person-years | IR per 10,000 person-years (95% CI) | HR  (95% CI) | aHR  (95% CI) |
| Women | | | | | | | | |
| 1-<2 years | 40 | 141,430 | 2.8 (2.0-3.7) | 156 | 698,498 | 2.2 (1.9-2.6) | 1.3 (0.90–1.8) | 1.1 (0.76–1.7) |
| 1-<3 years | 75 | 275,356 | 2.7 (2.1-3.3) | 296 | 1,360,072 | 2.2 (1.9-2.4) | 1.3 (0.97–1.6) | 1.1 (0.86–1.5) |
| 1-<5 years | 131 | 519,023 | 2.5 (2.1-3.0) | 569 | 2,564,602 | 2.2 (2.0-2.4) | 1.1 (0.94–1.4) | 1.1 (0.85–1.3) |
| 1-<10 years | 287 | 988,803 | 2.9 (2.6-3.2) | 1,169 | 4,893,408 | 2.4 (2.3-2.5) | 1.2 (1.1–1.4) | 1.1 (0.96–1.3) |
| 1-<15 years | 425 | 1,289,243 | 3.3 (3.0-3.6) | 1,637 | 6,393,612 | 2.6 (2.4-2.7) | 1.3 (1.2–1.4) | 1.2 (1.0–1.3) |
| 1-<20 years | 514 | 1,459,837 | 3.5 (3.2-3.8) | 1,919 | 7,255,516 | 2.6 (2.5-2.8) | 1.3 (1.2–1.5) | 1.2 (1.1–1.3) |
| 1-<30 years | 567 | 1,543,068 | 3.7 (3.4-4.0) | 2,064 | 7,686,471 | 2.7 (2.6-2.8) | 1.4 (1.3–1.5) | 1.3 (1.1–1.4) |
| Men | | | | | | | | |
| 1-<2 years | 14 | 94,956 | 1.5 (0.7-2.2) | 40 | 471,067 | 0.8 (0.6-1.1) | 1.8 (0.97–3.3) | 1.6 (0.75–3.2) |
| 1-<3 years | 29 | 184,628 | 1.6 (1.0-2.1) | 81 | 919,076 | 0.9 (0.7-1.1) | 1.8 (1.2–2.8) | 1.6 (0.99–2.5) |
| 1-<5 years | 42 | 346,911 | 1.2 (0.8-1.6) | 175 | 1,736,890 | 1.0 (0.9-1.2) | 1.2 (0.85–1.7) | 0.93 (0.63–1.4) |
| 1-<10 years | 95 | 654,613 | 1.5 (1.2-1.7) | 380 | 3,313,554 | 1.1 (1.0-1.3) | 1.3 (1.1–1.7) | 1.0 (0.80–1.3) |
| 1-<15 years | 138 | 841,894 | 1.6 (1.4-1.9) | 564 | 4,300,579 | 1.3 (1.2-1.4) | 1.3 (1.1–1.6) | 1.0 (0.85–1.3) |
| 1-<20 years | 168 | 943,231 | 1.8 (1.5-2.1) | 683 | 4,852,161 | 1.4 (1.3-1.5) | 1.3 (1.1–1.6) | 1.1 (0.89–1.3) |
| 1-<30 years | 188 | 988,571 | 1.9 (1.6-2.2) | 756 | 5,112,349 | 1.5 (1.4-1.6) | 1.3 (1.1–1.6) | 1.1 (0.91–1.3) |

**Abbreviations:** HPV, human papillomavirus; IR, incidence rate; HR, hazard ratio; CCI, Charlson Comorbidity Index
